# Supplementary material for: Ureteral stricture formation after removal of proximal ureteral stone: retroperitoneal laparoscopic ureterolithotomy versus ureteroscopy with holmium: YAG laser lithotripsy
Source: PeerJ. 2017 Jun 30;5:e3483. doi: 10.7717/peerj.3483 (PMC5494178; doi:10.7717/peerj.3483)
Supplement: Supplemental Information 1 [file peerj-05-3483-s001.xlsx]

## Sheet: Sheet1
Patient No.	Procedure type	Sex	Age	BMI	ASA Grade	Disease duration	Ipsilateral stone surgery history	With/Without comorbidity	Stone diameter (mm)	Hydronephrosis grade	Urine culture	Stone laterality	Stone free	Complication grade	stent duration(months)	Ureteral Stricture
1	URSL	female	55	25.4	Ⅱ	more than 1 year	Yes	Without	10	2	Negative	Left	Yes	0	1	No
2	URSL	male	48	21.5	Ⅱ	less than 3 months	No	Without	8	2	Negative	Right	Yes	0	1.14	No
3	URSL	male	62	22.4	Ⅱ	more than 1 year	No	With	20	0	Negative	Left	Yes	0	2	No
4	URSL	male	45	31.2	Ⅱ	more than 1 year	Yes	With	10	3	Negative	Left	No	0	1	No
5	URSL	male	51	23	Ⅱ	more than 1 year	Yes	With	9	2	Not available	Right	Yes	0	1	No
6	URSL	female	71	20.9	Ⅲ	more than 1 year	No	Without	6	1	Positive	Left	Yes	0	1	No
7	URSL	female	67	25.1	Ⅲ	less than 3 months	No	With	15	3	Negative	Right	Yes	0	0.23	No
8	URSL	male	51	19.9	Ⅱ	more than 1 year	No	With	10	1	Negative	Right	Yes	0	1	No
10	URSL	male	43	18.8	Ⅰ	more than 1 year	No	Without	15	1	Negative	Left	Yes	0	1	No
11	URSL	male	29	23.7	Ⅲ	less than 3 months	No	Without	13	3	Not available	Left	Yes	0	1	No
600	URSL	male	29	23.7	Ⅲ	less than 3 months	No	Without	14	3	Not available	Right	Yes	0	1	No
12	URSL	male	31	23.1	Ⅰ	3~12 months	No	Without	14	2	Not available	Left	Yes	0	1	No
13	URSL	male	63	25.4	Ⅱ	more than 1 year	No	With	11	3	Negative	Right	Yes	0	2	No
14	URSL	female	58	23.4	Ⅱ	more than 1 year	No	Without	8	2	Negative	Right	Yes	0	1	No
15	URSL	male	30	29	Ⅱ	more than 1 year	Yes	With	10	2	Negative	Right	Yes	0	1	No
18	URSL	male	34	27.2	Ⅱ	less than 3 months	No	With	10	2	Negative	Right	Yes	0	1	No
19	URSL	female	45	25	Ⅱ	3~12 months	Yes	Without	10	0	Not available	Right	Yes	0	1	No
21	URSL	female	53	26.2	Ⅰ	more than 1 year	No	Without	11	2	Not available	Left	Yes	0	1	No
22	URSL	male	58	22.8	Ⅱ	less than 3 months	No	Without	10	0	Negative	Right	No	0	1	Yes
25	URSL	female	69	29.7	Ⅲ	more than 1 year	Yes	With	8	2	Positive	Right	Yes	0	0.5	No
26	URSL	male	59	26.7	Ⅰ	3~12 months	No	Without	10	1	Negative	Left	No	0	2.5	No
27	URSL	male	32	27.5	Ⅰ	more than 1 year	Yes	Without	12	1	Negative	Right	Yes	0	1	No
28	URSL	female	46	26.4	Ⅱ	less than 3 months	No	Without	10	3	Negative	Left	Yes	0	1.5	No
30	URSL	male	52	24.7	Ⅰ	less than 3 months	No	Without	9	2	Not available	Right	No	0	1	No
31	URSL	male	65	22	Ⅰ	more than 1 year	No	With	12	2	Negative	Left	Yes	0	1	No
32	URSL	male	17	28.1	Ⅰ	3~12 months	Yes	Without	10	1	Negative	Right	Yes	0	1	No
33	URSL	male	59	29.4	Ⅱ	more than 1 year	No	Without	12	2	Not available	Right	Yes	0	1	No
34	URSL	male	61	26.1	Ⅱ	more than 1 year	Yes	With	20	2	Negative	Left	Yes	0	1	No
35	URSL	female	41	25.8	Ⅰ	less than 3 months	No	Without	15	2	Negative	Left	Yes	0	1	No
36	URSL	male	46	20.3	Ⅰ	more than 1 year	No	With	20	3	Not available	Right	Yes	0	1	No
39	URSL	female	51	33.7	Ⅰ	less than 3 months	No	Without	15	2	Negative	Left	Yes	2	1	No
40	URSL	female	59	23	Ⅱ	more than 1 year	No	Without	7	1	Not available	Left	Yes	0	1	No
42	URSL	male	45	27.2	Ⅱ	less than 3 months	No	With	12	1	Not available	Right	No	0	1	No
44	URSL	male	48	23.1	Ⅰ	less than 3 months	No	Without	10	2	Not available	Right	Yes	0	1	No
45	URSL	male	52	21.2	Ⅰ	less than 3 months	No	Without	15	2	Negative	Right	Yes	0	1	No
46	URSL	male	42	29.1	Ⅱ	less than 3 months	No	With	10	1	Negative	Right	Yes	0	1	No
47	URSL	male	52	19.7	Ⅲ	less than 3 months	No	Without	8	1	Negative	Right	No	2	4	No
48	URSL	male	57	30.8	Ⅲ	less than 3 months	No	With	10	1	Negative	Left	Yes	0	1	No
49	URSL	female	50	25.6	Ⅱ	more than 1 year	No	With	12	1	Not available	Right	Yes	0	0.5	No
51	URSL	male	49	24.8	Ⅱ	more than 1 year	No	Without	10	2	Negative	Right	Yes	0	0.83	No
52	URSL	male	46	24.3	Ⅱ	less than 3 months	No	Without	15	2	Negative	Left	Yes	0	1	No
55	URSL	male	61	20.3	Ⅰ	more than 1 year	No	With	9	1	Negative	Left	Yes	0	1	No
56	URSL	male	36	27.6	Ⅰ	less than 3 months	No	With	7	0	Negative	Right	Yes	2	1	No
58	URSL	male	43	22.3	Ⅱ	less than 3 months	Yes	Without	7	1	Not available	Right	Yes	0	1	No
59	URSL	female	58	19.6	Ⅰ	less than 3 months	No	Without	10	1	Not available	Right	Yes	2	1	No
60	URSL	male	33	26.7	Ⅰ	more than 1 year	No	Without	15	3	Negative	Right	Yes	1	0.67	No
62	URSL	male	49	21.9	Ⅰ	less than 3 months	No	Without	10	2	Negative	Left	Yes	0	1.5	Yes
63	URSL	male	37	22.7	Ⅰ	more than 1 year	No	Without	12	2	Negative	Left	No	1	1	No
64	URSL	female	60	23.8	Ⅰ	3~12 months	No	Without	9	2	Negative	Right	Yes	0	1	No
65	URSL	male	64	27.3	Ⅱ	less than 3 months	No	Without	15	1	Negative	Right	No	0	1	No
66	URSL	female	42	20.4	Ⅱ	more than 1 year	No	Without	15	2	Not available	Left	Yes	0	1	No
67	URSL	female	59	23.2	Ⅱ	more than 1 year	No	With	10	1	Negative	Left	Yes	2	0.83	No
68	URSL	male	39	23.7	Ⅰ	less than 3 months	No	Without	11	2	Negative	Right	Yes	0	1	No
69	URSL	female	26	20.7	Ⅰ	more than 1 year	Yes	With	8	1	Negative	Left	Yes	2	1	No
70	URSL	male	67	26.4	Ⅱ	more than 1 year	Yes	With	14	2	Negative	Left	No	0	1	No
71	URSL	female	66	21.2	Ⅱ	more than 1 year	No	Without	10	0	Not available	Left	Yes	0	2	No
72	URSL	female	31	25.7	Ⅰ	less than 3 months	No	Without	11	1	Not available	Left	Yes	0	1	No
75	URSL	male	69	21.9	Ⅲ	more than 1 year	No	With	15	1	Negative	Left	No	0	1.5	No
76	URSL	male	67	23.4	Ⅱ	more than 1 year	No	With	8	1	Not available	Left	Yes	0	1	No
77	URSL	male	46	27.3	Ⅱ	less than 3 months	Yes	With	9	1	Negative	Left	Yes	0	0.33	No
78	URSL	male	32	26.4	Ⅰ	3~12 months	Yes	Without	10	1	Negative	Left	Yes	0	1	No
80	URSL	female	58	24.3	Ⅱ	more than 1 year	No	With	10	1	Negative	Right	Yes	2	1	No
83	URSL	male	49	22.8	Ⅱ	more than 1 year	Yes	With	15	2	Negative	Left	No	0	0.5	No
84	URSL	female	45	20	Ⅱ	more than 1 year	Yes	Without	10	1	Negative	Left	No	0	0.5	No
85	URSL	female	39	21.9	Ⅱ	3~12 months	No	Without	10	2	Not available	Left	No	0	1	No
86	URSL	male	54	24.7	Ⅱ	less than 3 months	No	With	12	2	Negative	Left	Yes	0	3	No
601	URSL	male	54	24.7	Ⅱ	less than 3 months	No	With	10	2	Negative	Right	Yes	0	3	No
88	URSL	male	56	23.9	Ⅰ	more than 1 year	Yes	With	9	2	Negative	Left	Yes	2	1	No
90	URSL	female	49	31.2	Ⅰ	more than 1 year	No	With	8	2	Not available	Right	No	0	1	No
91	URSL	male	46	25.4	Ⅰ	more than 1 year	Yes	Without	15	1	Positive	Right	Yes	1	0.5	No
94	URSL	male	60	27.7	Ⅱ	less than 3 months	No	With	10	1	Negative	Right	Yes	0	4	No
96	URSL	male	62	27.3	Ⅱ	less than 3 months	No	With	12	2	Not available	Left	No	0	1	Yes
97	URSL	male	66	18.7	Ⅰ	less than 3 months	No	Without	18	1	Negative	Left	Yes	0	1.16	No
98	URSL	male	36	27	Ⅱ	more than 1 year	No	With	9	1	Negative	Right	Yes	0	1	No
99	URSL	male	27	26	Ⅱ	more than 1 year	No	Without	7	1	Negative	Left	Yes	0	1	Yes
100	URSL	male	46	28	Ⅰ	less than 3 months	No	Without	10	1	Not available	Left	Yes	0	1.5	No
101	URSL	male	59	26.1	Ⅱ	less than 3 months	No	Without	12	2	Not available	Left	Yes	0	1	No
103	URSL	male	40	26.2	Ⅰ	more than 1 year	No	Without	12	2	Negative	Right	Yes	2	1.5	No
104	URSL	female	43	24	Ⅱ	more than 1 year	No	With	12	3	Not available	Left	Yes	0	1	No
106	URSL	male	39	30.4	Ⅱ	3~12 months	No	Without	7	1	Not available	Left	Yes	0	0.67	No
107	URSL	female	58	23.7	Ⅰ	less than 3 months	No	With	10	3	Negative	Left	Yes	0	1	No
108	URSL	male	41	26.1	Ⅰ	less than 3 months	No	Without	9	2	Negative	Right	Yes	0	2	No
109	URSL	male	51	22.2	Ⅱ	more than 1 year	Yes	Without	8	1	Negative	Right	Yes	1	1	No
110	URSL	male	48	22.1	Ⅰ	less than 3 months	No	Without	10	1	Negative	Left	Yes	0	1	No
112	URSL	male	31	24.6	Ⅱ	less than 3 months	No	Without	13	0	Negative	Left	Yes	0	2	No
113	URSL	female	52	27.9	Ⅲ	more than 1 year	No	With	15	1	Not available	Right	Yes	0	1	No
114	URSL	male	43	29.6	Ⅲ	3~12 months	No	Without	11	1	Negative	Left	Yes	0	1	No
115	URSL	male	33	25.6	Ⅰ	3~12 months	No	Without	15	1	Negative	Left	Yes	0	1	No
116	URSL	male	78	19.7	Ⅲ	more than 1 year	Yes	Without	12	1	Negative	Right	Yes	0	1	No
118	URSL	female	60	28.1	Ⅱ	more than 1 year	No	With	10	1	Positive	Right	Yes	2	1	No
119	URSL	male	67	17.3	Ⅱ	3~12 months	No	Without	12	1	Negative	Right	No	0	1	No
120	URSL	male	45	25.3	Ⅱ	more than 1 year	No	With	9	1	Negative	Left	Yes	0	1	No
122	URSL	male	59	20.6	Ⅱ	less than 3 months	No	Without	13	1	Negative	Left	Yes	0	1	No
125	URSL	male	64	20.5	Ⅱ	more than 1 year	Yes	With	10	2	Negative	Left	Yes	0	3	No
127	URSL	male	48	25.4	Ⅱ	more than 1 year	No	Without	9	1	Negative	Right	Yes	0	3	No
130	URSL	male	27	21.1	Ⅱ	less than 3 months	No	Without	10	2	Not available	Right	No	0	1	No
131	URSL	female	45	21.4	Ⅱ	less than 3 months	No	Without	7	2	Negative	Right	Yes	0	1	No
132	URSL	male	42	26.7	Ⅱ	more than 1 year	Yes	With	14	3	Negative	Right	Yes	0	1	No
133	URSL	male	25	20.9	Ⅰ	more than 1 year	No	Without	8	2	Negative	Right	Yes	0	1	No
134	URSL	male	42	27.7	Ⅱ	more than 1 year	Yes	With	8	2	Negative	Left	Yes	0	1	No
135	URSL	male	35	25.9	Ⅱ	less than 3 months	No	With	9	1	Negative	Left	Yes	0	1	No
136	URSL	male	40	25.7	Ⅰ	less than 3 months	No	Without	15	2	Negative	Left	Yes	0	1	No
137	URSL	female	68	22.5	Ⅱ	3~12 months	No	With	11	2	Not available	Right	Yes	0	1	No
138	URSL	male	37	23.2	Ⅰ	more than 1 year	Yes	Without	8	1	Negative	Left	Yes	0	1	No
139	URSL	male	28	25.9	Ⅰ	less than 3 months	No	Without	10	2	Negative	Left	Yes	0	1	No
140	URSL	male	21	21.5	Ⅰ	more than 1 year	Yes	Without	18	1	Negative	Right	Yes	0	3	No
141	URSL	female	49	24.4	Ⅰ	less than 3 months	No	Without	10	2	Negative	Left	Yes	0	1	No
142	URSL	male	71	20.4	Ⅱ	more than 1 year	No	With	15	1	Negative	Left	Yes	0	1.5	No
143	URSL	female	66	36.2	Ⅱ	more than 1 year	No	Without	12	1	Not available	Left	Yes	0	1	No
145	URSL	male	36	23.3	Ⅰ	more than 1 year	No	Without	8	1	Negative	Left	No	0	1	No
146	URSL	female	62	32.4	Ⅰ	more than 1 year	No	With	10	2	Not available	Right	No	0	2	No
147	URSL	male	31	19.8	Ⅰ	less than 3 months	Yes	Without	12	2	Not available	Left	No	0	1	No
151	URSL	female	41	19.9	Ⅰ	less than 3 months	No	Without	10	3	Not available	Left	No	0	6	No
602	URSL	female	43	19.2	Ⅰ	less than 3 months	No	Without	13	4	Negative	Right	No	0	6	No
156	URSL	female	50	21.3	Ⅰ	less than 3 months	No	Without	10	4	Negative	Left	No	0	1	No
160	URSL	male	39	25.9	Ⅱ	less than 3 months	Yes	Without	15	1	Negative	Right	Yes	0	1.5	No
163	URSL	male	55	25.3	Ⅱ	3~12 months	No	Without	15	1	Not available	Right	Yes	0	1	No
165	URSL	female	60	19	Ⅱ	more than 1 year	No	Without	15	1	Positive	Right	Yes	0	1	No
166	URSL	male	40	28.8	Ⅰ	more than 1 year	No	Without	15	1	Negative	Left	Yes	0	1	No
167	URSL	male	42	24.9	Ⅰ	less than 3 months	Yes	Without	10	1	Negative	Left	Yes	0	1	No
168	URSL	male	68	22.3	Ⅱ	less than 3 months	No	Without	10	1	Negative	Left	Yes	0	0.67	No
178	URSL	male	53	22.4	Ⅱ	less than 3 months	No	With	10	0	Negative	Left	No	0	1.5	No
603	URSL	male	53	22.4	Ⅱ	less than 3 months	No	Without	10	4	Negative	Right	No	0	1.5	No
180	URSL	male	49	19.5	Ⅱ	more than 1 year	No	Without	20	2	Not available	Left	Yes	0	1	No
182	URSL	male	50	20	Ⅰ	less than 3 months	Yes	With	15	1	Not available	Left	Yes	0	1	No
186	URSL	male	58	20.1	Ⅱ	less than 3 months	No	With	8	0	Negative	Right	Yes	0	1	No
187	URSL	male	61	22.5	Ⅱ	more than 1 year	Yes	With	10	3	Negative	Right	Yes	0	1	No
188	URSL	male	23	22.8	Ⅰ	less than 3 months	No	Without	10	1	Not available	Left	Yes	0	1	No
189	URSL	male	33	27.3	Ⅰ	less than 3 months	No	Without	10	1	Negative	Left	Yes	0	1	No
191	URSL	female	34	25.7	Ⅱ	less than 3 months	No	Without	10	1	Positive	Right	Yes	0	1	No
194	URSL	male	27	24.9	Ⅱ	more than 1 year	No	Without	10	3	Not available	Left	Yes	0	1	No
198	URSL	female	49	24.7	Ⅰ	less than 3 months	No	Without	10	1	Not available	Right	Yes	0	0.23	No
199	URSL	male	41	28.3	Ⅰ	less than 3 months	No	Without	12	2	Negative	Right	Yes	0	1	No
201	URSL	male	80	27.1	Ⅱ	less than 3 months	No	With	15	1	Negative	Left	Yes	0	0.23	No
202	URSL	male	72	26.3	Ⅱ	less than 3 months	No	Without	10	1	Negative	Left	Yes	0	1	No
205	URSL	male	66	27.7	Ⅱ	less than 3 months	No	With	7	1	Negative	Right	Yes	0	2	No
207	URSL	female	27	26.7	Ⅱ	less than 3 months	No	Without	8	1	Negative	Left	Yes	0	1	No
209	URSL	female	59	22.2	Ⅱ	less than 3 months	No	With	12	1	Not available	Left	Yes	0	1	No
212	URSL	female	52	23.4	Ⅰ	less than 3 months	No	Without	15	1	Negative	Right	Yes	0	2	No
213	URSL	female	77	19.9	Ⅰ	less than 3 months	No	With	10	1	Not available	Left	Yes	1	1	No
214	URSL	female	61	21.7	Ⅱ	less than 3 months	No	Without	10	1	Not available	Left	No	0	1	No
217	URSL	male	62	25.4	Ⅰ	less than 3 months	No	With	15	1	Negative	Left	Yes	0	1	No
219	URSL	male	72	24.1	Ⅱ	less than 3 months	No	With	10	3	Negative	Left	Yes	0	3	No
604	URSL	male	72	24.1	Ⅱ	less than 3 months	No	Without	10	4	Negative	Right	Yes	0	3	No
220	URSL	male	53	26.1	Ⅰ	less than 3 months	No	Without	17	1	Negative	Right	Yes	0	1	No
221	URSL	male	73	26.6	Ⅱ	less than 3 months	No	Without	15	4	Negative	Right	Yes	0	1	No
222	URSL	male	31	20.8	Ⅱ	less than 3 months	No	Without	15	2	Negative	Left	Yes	0	3	No
224	URSL	male	45	27.1	Ⅱ	less than 3 months	No	With	15	2	Not available	Left	Yes	0	1	No
225	URSL	male	28	23.5	Ⅰ	less than 3 months	No	Without	16	1	Negative	Left	Yes	0	1	No
227	URSL	male	50	26	Ⅱ	less than 3 months	No	With	12	1	Negative	Left	No	0	1	No
237	URSL	male	58	21.8	Ⅲ	more than 1 year	No	With	10	1	Not available	Left	Yes	0	1	No
240	URSL	male	40	27.7	Ⅱ	less than 3 months	No	Without	10	1	Negative	Left	Yes	0	1	No
241	URSL	male	32	23	Ⅱ	less than 3 months	No	With	10	1	Not available	Right	Yes	0	1	No
243	URSL	male	35	18.6	Ⅱ	3~12 months	No	Without	6	2	Negative	Right	Yes	0	3	No
244	URSL	female	53	18.9	Ⅲ	less than 3 months	No	With	12	1	Not available	Right	Yes	0	1	No
245	URSL	female	50	35.5	Ⅰ	less than 3 months	No	Without	16	4	Negative	Left	Yes	0	1	No
246	URSL	male	46	20.4	Ⅱ	less than 3 months	No	Without	10	2	Negative	Right	No	0	1	No
250	URSL	male	71	25.8	Ⅲ	less than 3 months	No	With	9	1	Negative	Right	Yes	0	1	No
251	URSL	male	54	20.8	Ⅰ	less than 3 months	No	Without	15	1	Not available	Right	Yes	0	1	No
252	RPLU	male	54	27.1	Ⅰ	3~12 months	No	Without	10	3	Negative	Right	Yes	0	2	Yes
254	RPLU	male	25	19.1	Ⅰ	more than 1 year	No	Without	15	1	Not available	Left	Yes	0	1	No
255	RPLU	male	62	23.7	Ⅱ	less than 3 months	No	With	16	2	Negative	Right	Yes	2	1	No
256	RPLU	male	47	24.2	Ⅱ	less than 3 months	No	Without	25	1	Not available	Left	Yes	0	1	No
257	RPLU	female	55	24.3	Ⅰ	less than 3 months	No	With	16	1	Not available	Right	Yes	0	1	No
258	RPLU	male	56	22.3	Ⅰ	less than 3 months	No	Without	6	1	Negative	Left	Yes	0	1	No
260	RPLU	male	56	24.2	Ⅱ	less than 3 months	No	With	15	1	Not available	Left	Yes	2	3	No
265	RPLU	female	55	26.6	Ⅱ	less than 3 months	No	With	16	3	Not available	Left	Yes	0	1	No
266	RPLU	male	58	23.4	Ⅱ	3~12 months	No	With	12	1	Negative	Right	Yes	0	1.5	No
267	RPLU	male	27	20.8	Ⅱ	3~12 months	Yes	Without	20	2	Negative	Right	Yes	0	1	No
268	RPLU	female	31	22.7	Ⅱ	more than 1 year	Yes	Without	17	1	Positive	Left	Yes	2	1	No
271	RPLU	male	44	24.6	Ⅱ	more than 1 year	No	Without	20	1	Negative	Right	Yes	0	2	No
272	RPLU	male	52	20.6	Ⅱ	less than 3 months	No	With	15	3	Negative	Right	Yes	0	1	No
273	RPLU	male	57	20.6	Ⅰ	less than 3 months	No	Without	25	4	Negative	Left	Yes	0	1	No
274	RPLU	male	46	25.7	Ⅱ	3~12 months	Yes	With	12	1	Negative	Right	Yes	2	0.5	No
275	RPLU	male	49	26.8	Ⅰ	less than 3 months	No	With	13	2	Positive	Left	Yes	0	2	No
277	RPLU	male	52	24.2	Ⅱ	3~12 months	No	With	12	2	Negative	Left	Yes	0	1.5	No
278	RPLU	male	58	21.5	Ⅱ	3~12 months	No	Without	13	1	Not available	Left	Yes	1	3	No
280	RPLU	female	28	22.1	Ⅱ	less than 3 months	No	Without	20	1	Negative	Right	Yes	0	1	No
281	RPLU	male	73	20.2	Ⅲ	more than 1 year	No	With	15	1	Negative	Left	Yes	0	1	No
282	RPLU	male	44	31.6	Ⅱ	more than 1 year	No	Without	10	1	Not available	Right	Yes	0	1	No
283	RPLU	male	42	27	Ⅰ	less than 3 months	No	Without	15	1	Not available	Left	Yes	0	1	No
284	RPLU	male	65	25.7	Ⅱ	3~12 months	No	With	20	3	Negative	Right	Yes	0	1	No
285	RPLU	male	52	26.4	Ⅱ	more than 1 year	Yes	Without	12	2	Not available	Right	Yes	0	3	No
286	RPLU	male	42	21.2	Ⅰ	more than 1 year	Yes	Without	8	1	Negative	Left	Yes	0	1	No
287	RPLU	female	57	Not available	Ⅱ	less than 3 months	No	Without	10	1	Not available	Left	Yes	2	1	No
288	RPLU	male	66	25.2	Ⅰ	less than 3 months	No	Without	11	2	Not available	Left	Yes	0	0.5	No
289	RPLU	male	52	Not available	Ⅰ	more than 1 year	Yes	Without	10	4	Negative	Right	Yes	0	1	No
290	RPLU	male	30	25.9	Ⅱ	3~12 months	Yes	Without	10	2	Negative	Left	Yes	0	1.5	No
291	RPLU	male	62	22.7	Ⅱ	3~12 months	No	Without	15	1	Negative	Right	Yes	0	0.67	No
292	RPLU	male	39	18.1	Ⅱ	more than 1 year	No	Without	12	2	Not available	Right	Yes	0	6	No
293	RPLU	male	65	23.2	Ⅱ	less than 3 months	No	Without	10	3	Negative	Right	Yes	0	1.5	No
294	RPLU	female	41	21.2	Ⅱ	more than 1 year	Yes	Without	6	1	Positive	Left	Yes	0	1	No
296	RPLU	male	74	23.4	Ⅰ	less than 3 months	No	With	18	1	Negative	Left	Yes	0	1	No
297	RPLU	female	49	23.4	Ⅰ	less than 3 months	No	Without	18	3	Negative	Right	Yes	0	2.5	No
298	RPLU	male	54	27.7	Ⅱ	less than 3 months	No	Without	11	1	Negative	Left	Yes	1	2	No
299	RPLU	male	28	21.2	Ⅰ	less than 3 months	No	Without	15	1	Negative	Left	Yes	0	1.5	No
301	RPLU	male	56	23.9	Ⅰ	less than 3 months	No	Without	19	1	Negative	Right	Yes	0	1	No
302	RPLU	female	58	22.4	Ⅱ	more than 1 year	No	Without	12	2	Not available	Left	Yes	0	1	No
303	RPLU	female	54	24.2	Ⅱ	3~12 months	No	Without	15	3	Not available	Right	Yes	0	1.5	No
305	RPLU	male	40	17.3	Ⅰ	less than 3 months	No	Without	20	3	Not available	Right	Yes	0	0.67	No
306	RPLU	male	34	28.7	Ⅰ	more than 1 year	Yes	Without	15	1	Not available	Right	Yes	0	1	No
309	RPLU	male	54	Not available	Ⅲ	3~12 months	No	Without	10	3	Not available	Left	Yes	2	1	No
310	RPLU	male	55	Not available	Ⅲ	more than 1 year	No	With	12	3	Negative	Left	Yes	0	1	No
313	RPLU	female	44	Not available	Ⅲ	more than 1 year	Yes	Without	12	1	Not available	Right	Yes	0	1	No
314	RPLU	male	67	Not available	Ⅱ	less than 3 months	No	With	20	3	Not available	Right	Yes	0	0.5	No
315	RPLU	female	33	Not available	Ⅱ	less than 3 months	Yes	Without	10	4	Not available	Right	Yes	0	1	No
318	RPLU	male	66	Not available	Ⅲ	more than 1 year	No	With	8	2	Not available	Right	Yes	0	2	No
319	RPLU	male	51	Not available	Ⅱ	less than 3 months	No	Without	10	0	Negative	Right	Yes	0	1	No
322	RPLU	female	53	31.3	Ⅱ	more than 1 year	No	With	15	3	Positive	Right	Yes	1	6	No
